# Supplementary material for: Pd Supported on Pr-Rich Cerium–Zirconium–Praseodymium Mixed Oxides for Propane and CO Oxidation
Source: MDPI journal article supplement (doi:10.3390/catal12080827), 2022-07-27
Supplement: s1 [file s1]

Archive with 1 entries (1 files):
- catalysts-1832536-supplementary.pdf
