# Supplementary material for: Pd Supported on Pr-Rich Cerium–Zirconium–Praseodymium Mixed Oxides for Propane and CO Oxidation
Source: MDPI journal article supplement (doi:10.3390/catal12080827), 2022-07-27
Supplement: s1 [file s1 › catalysts-1832536-supplementary.pdf]

# **Pd supported on Pr-rich cerium-zirconium-praseodymium mixed oxides for propane and CO oxidation**

**S. Fahed<sup>1,2</sup>, R. Pointecouteau<sup>3,4</sup>, M. Aouine<sup>1</sup>, A. Boréave<sup>1</sup>, S. Gil<sup>1</sup>, P. Bazin<sup>2</sup>, A. Demourgues<sup>3</sup>, M. Daturi<sup>2</sup>, P. Vernoux<sup>1</sup>**

<sup>1</sup>Univ Lyon, Université Claude Bernard Lyon 1, CNRS, IRCELYON, F-69626, Villeurbanne, France

<sup>2</sup>Normandie Université, ENSICAEN, UNICAEN, CNRS, Laboratoire Catalyse et Spectrochimie, 14050 Caen, France

<sup>3</sup>CNRS, Université de Bordeaux, ICMCB, 87 Avenue du Dr. Albert Schweitzer, 33608 Pessac, France

<sup>4</sup>Institut de Chimie des Milieux et Matériaux de Poitiers (IC2MP), Université de Poitiers, CNRS UMR 7285, TSA51106 – F86073 Poitiers Cedex 9, France

**Supplementary information**

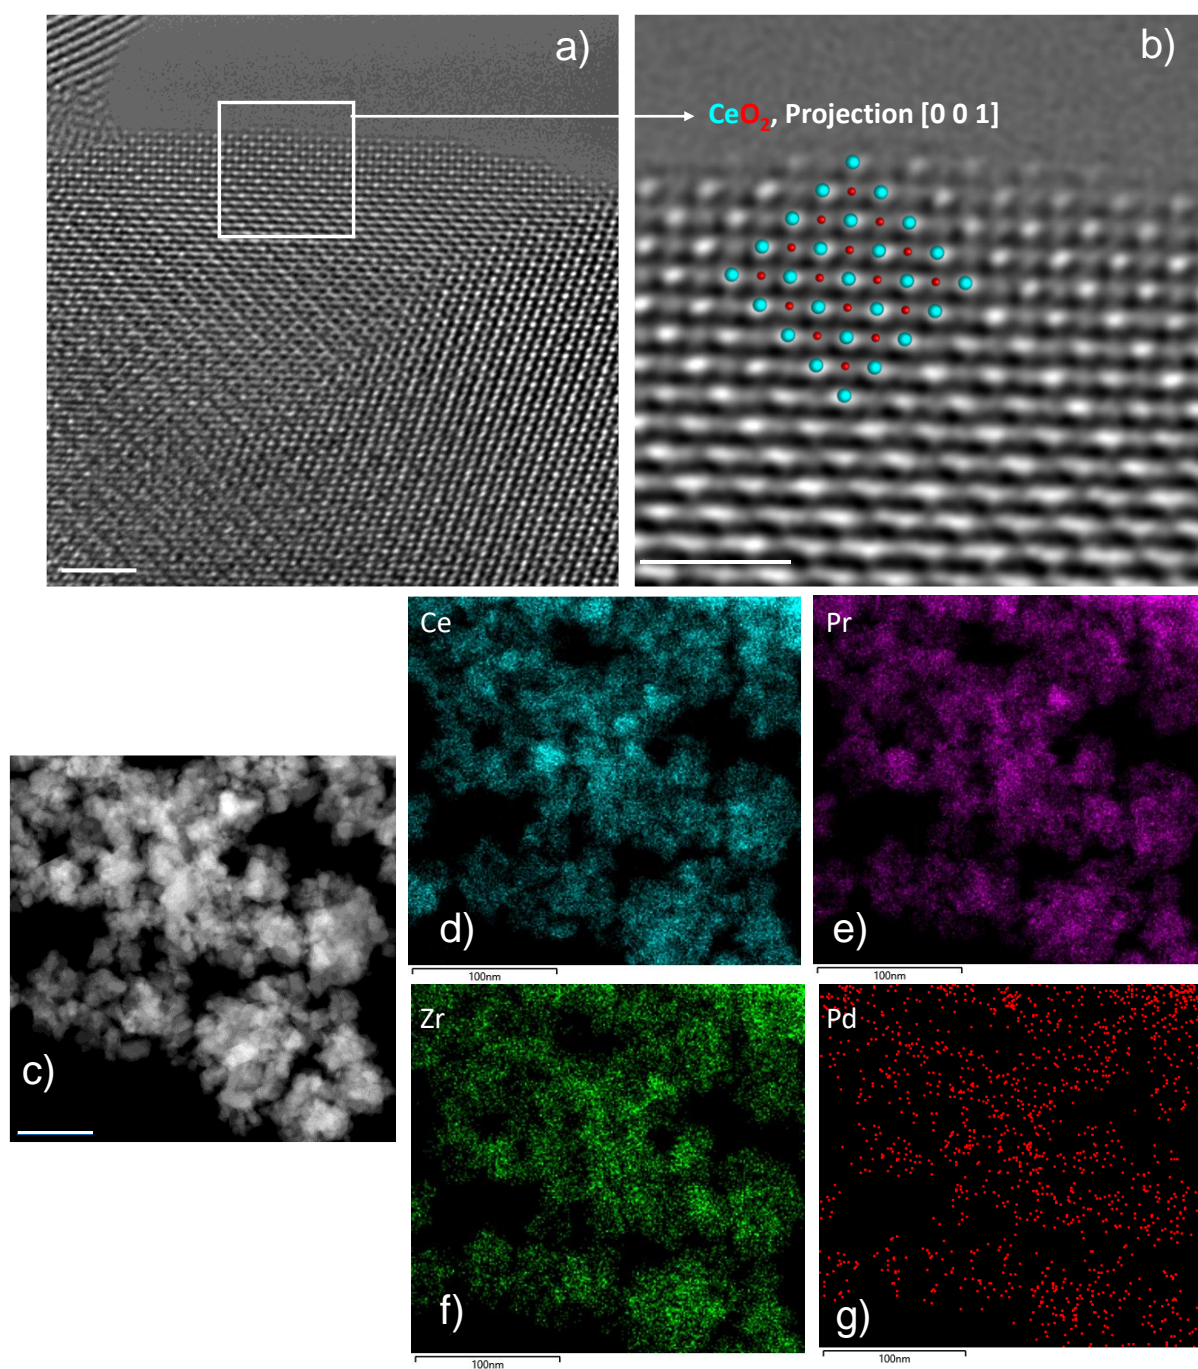

**Figure S1.** a) and c) representative HAADF-STEM images of Pd-HS, b) zoom in the with square of a) showing atomic columns of Ce and O characteristic of a plan (001) of a  $\text{CeO}_2$  fluorite structure, d) e) f) and g) EDX mappings of Ce, Pr, Zr and Pd, respectively.

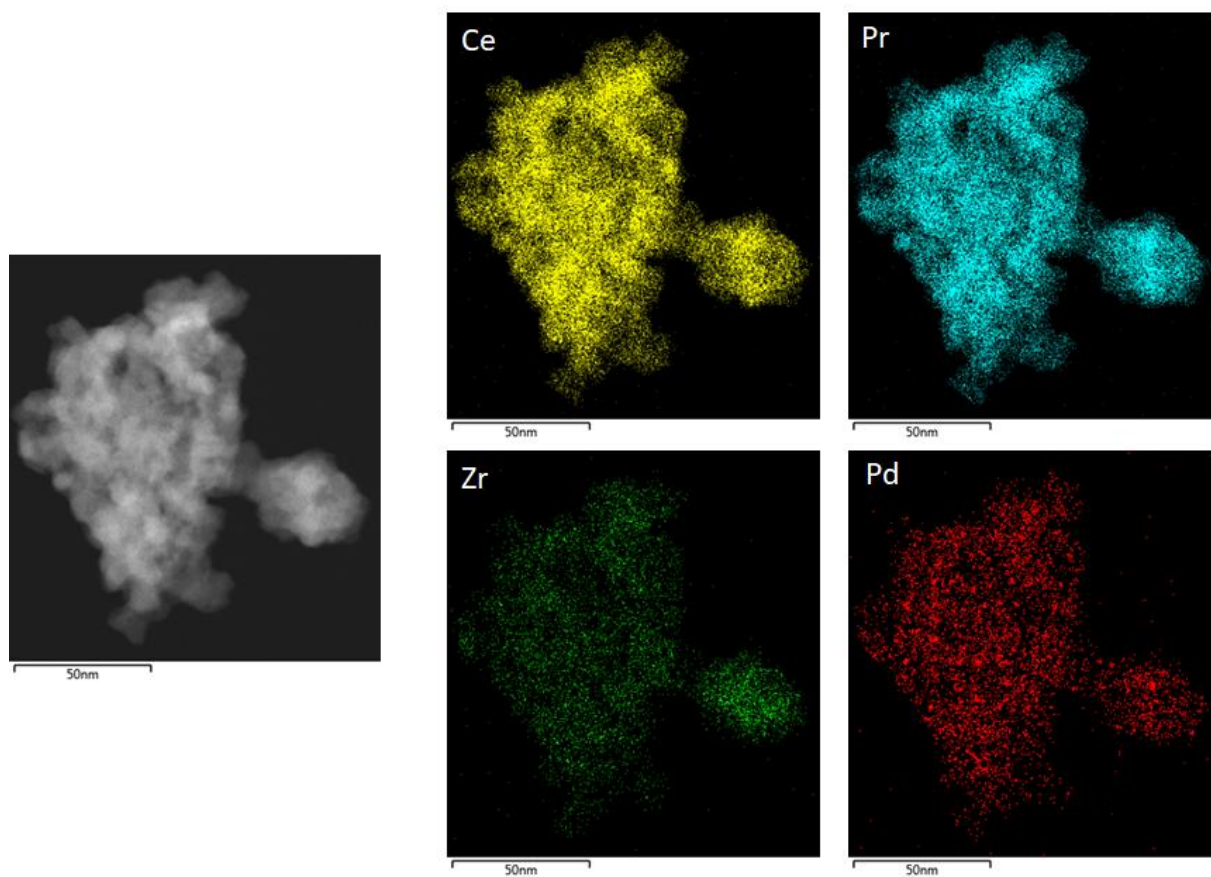

**Figure S2.** TEM image of Pd-HS after reduction in H<sub>2</sub> (500 °C, 1 h, 100 vol% H<sub>2</sub>) and EDX mapping of Ce, Pr, Zr and Pd.

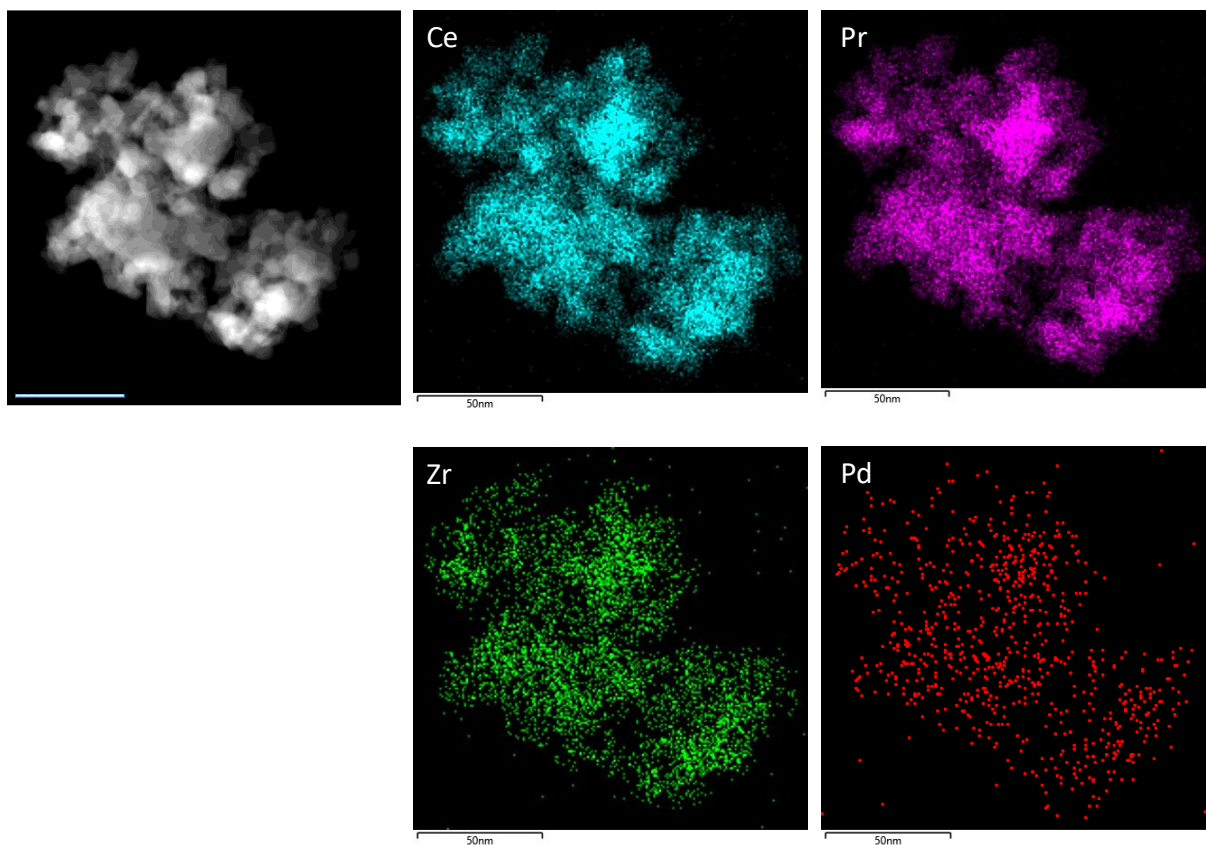

**Figure S3.** TEM image of Pd-HS after reduction in CO (500 °C, 1 h, 1 vol% CO) and EDX mapping of Ce, Pr, Zr and Pd.

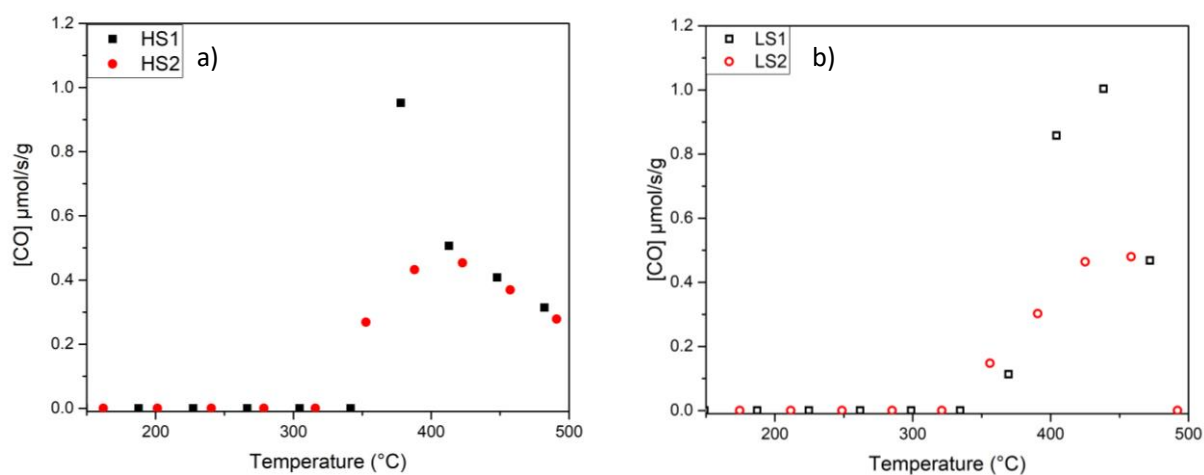

**Figure S4.** Variation of the CO production as a function of the temperature for a) Pd-HS and b) Pd-LS during C<sub>3</sub>H<sub>8</sub>-TPD experiments.

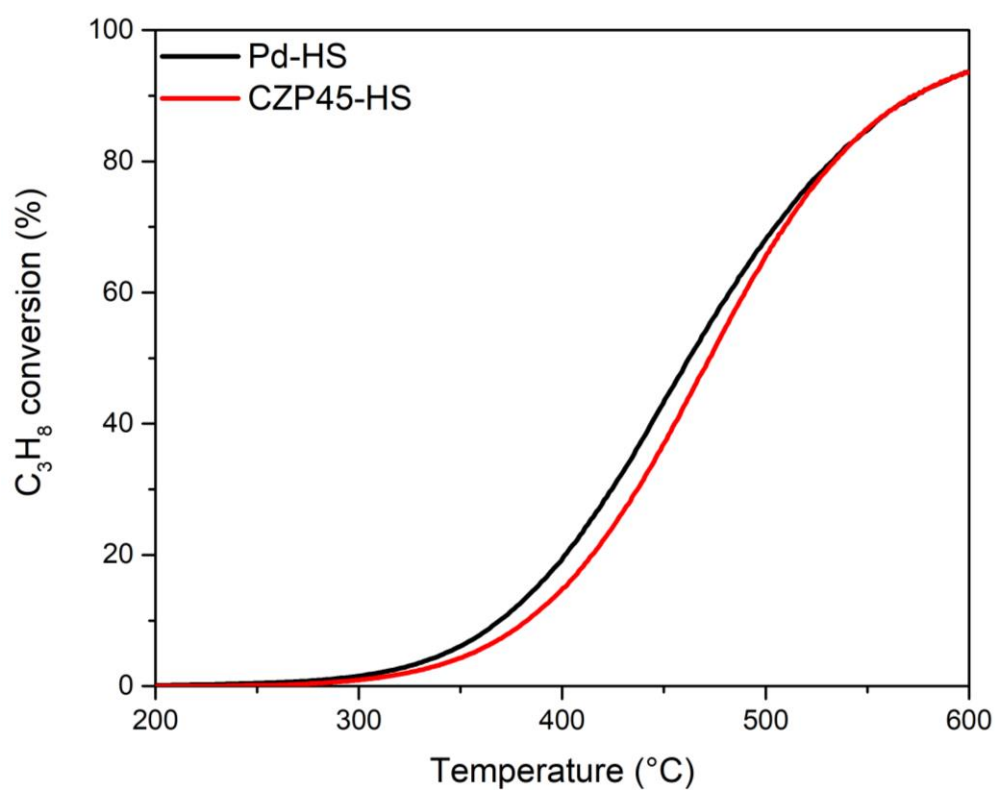

**Figure S5.** Variation of the propane conversion as a function of the temperature for Pd-HS (catalyst mass = 100 mg) and CZP45-HS (catalyst mass = 90 mg). Reactive mixture:  $C_3H_8/O_2$ : 2000 ppm / 9 vol%.

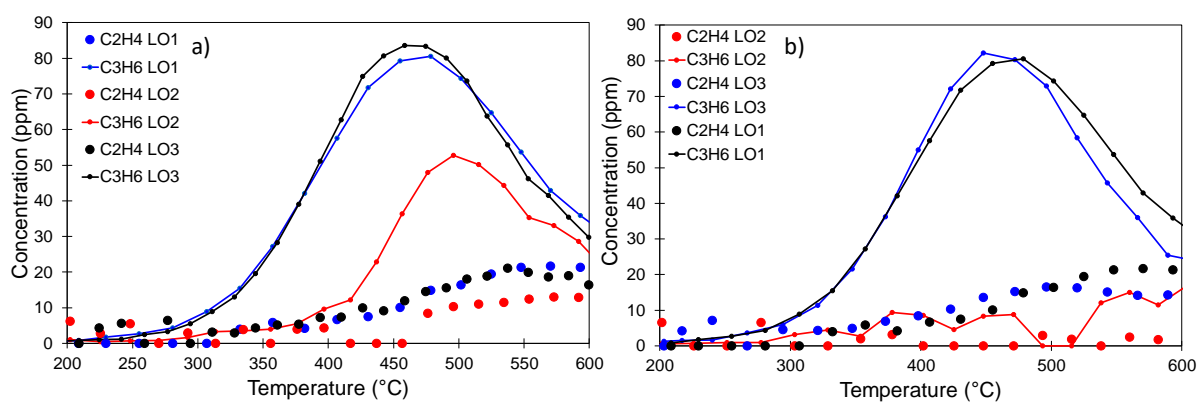

**Figure S6.** Secondary products analyzed during propane oxidation experiments on Pd-HS: a) LO2 after an H<sub>2</sub> reduction and b) LO2 after a CO reduction.

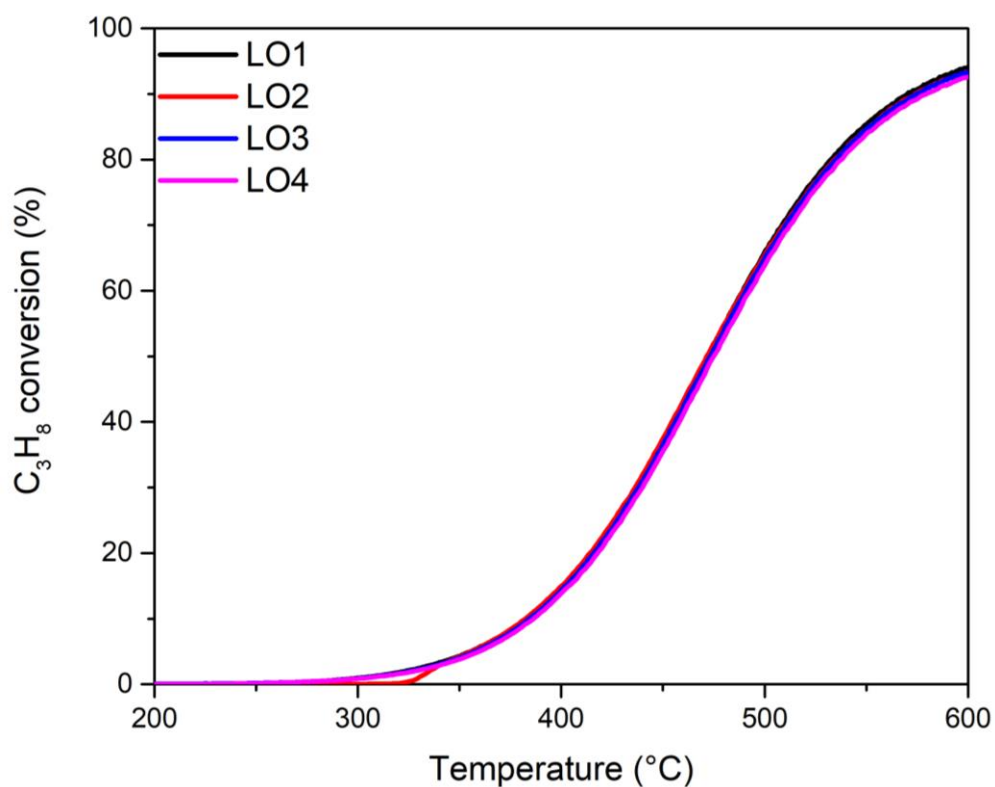

**Figure S7.** Variation of the propane conversion as a function of the temperature for CZP45-HS (reduction step in  $H_2$ .) Reactive mixture:  $C_3H_8/O_2$ : 2000 ppm / 9 vol%. Catalyst mass = 90 mg.

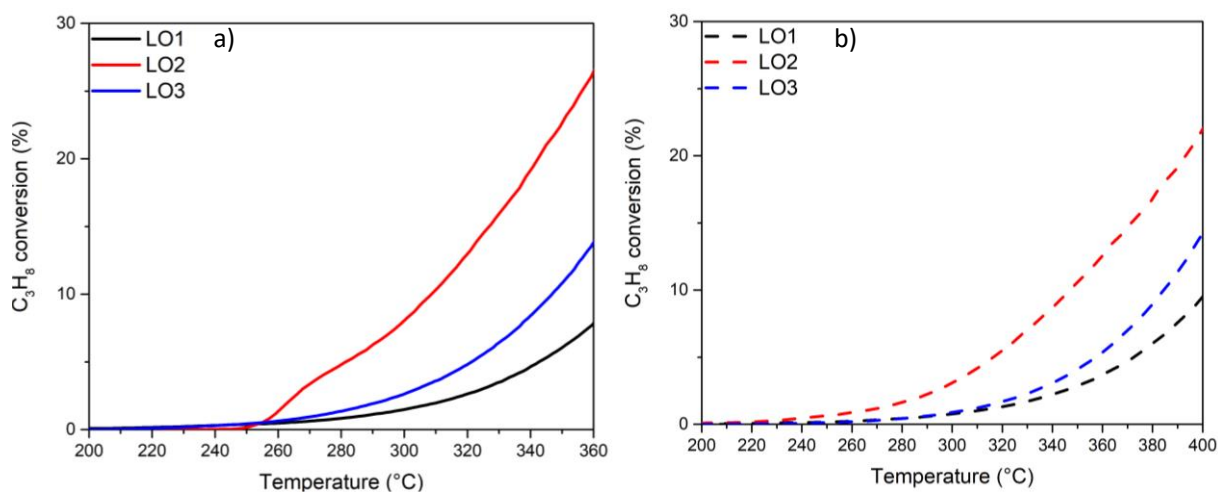

**Figure S8.** Variation of the propane conversion as a function of the temperature: a) on Pd-HS up to 360 °C and b) on Pd-LS up to 400 °C. The reduction step between LO1 and LO2 was performed in  $H_2$ .

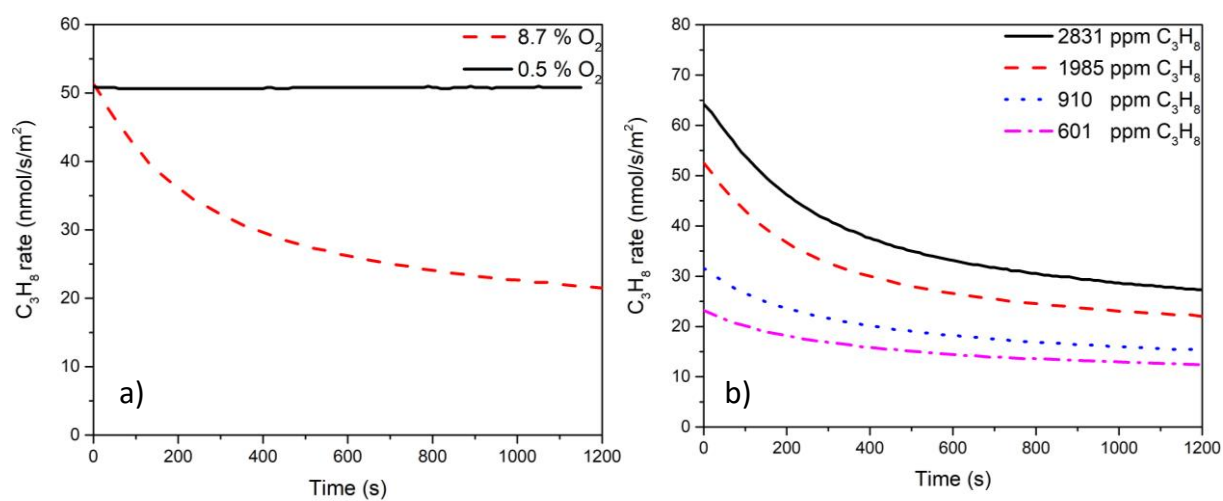

**Figure S9.** Variation of the intrinsic reaction rate as a function of time for Pd-HS at 360 °C a) for different oxygen concentrations using 1985  $\pm$  9 ppm of  $\text{C}_3\text{H}_8$  and b) for different  $\text{C}_3\text{H}_8$  concentration using 8.7 vol% of  $\text{O}_2$ .
